# Supplementary material for: A revised model of global silicate weathering considering the influence of vegetation cover on erosion rate
Source: Copernicus journal article supplement (doi:10.5194/gmd-17-3949-2024), 2024-05-15
Supplement: Supplementary file 1 [file gmd-17-3949-2024-supplement.pdf]

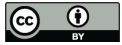

*Supplement of*

## **A revised model of global silicate weathering considering the influence of vegetation cover on erosion rate**

**Haoyue Zuo et al.**

*Correspondence to:* Yonggang Liu (ygliu@pku.edu.cn) and Yongyun Hu (yyhu@pku.edu.cn)

The copyright of individual parts of the supplement might differ from the article licence.

## Contents:

Figure S1 - Figure S11

Table S1 - Table S5

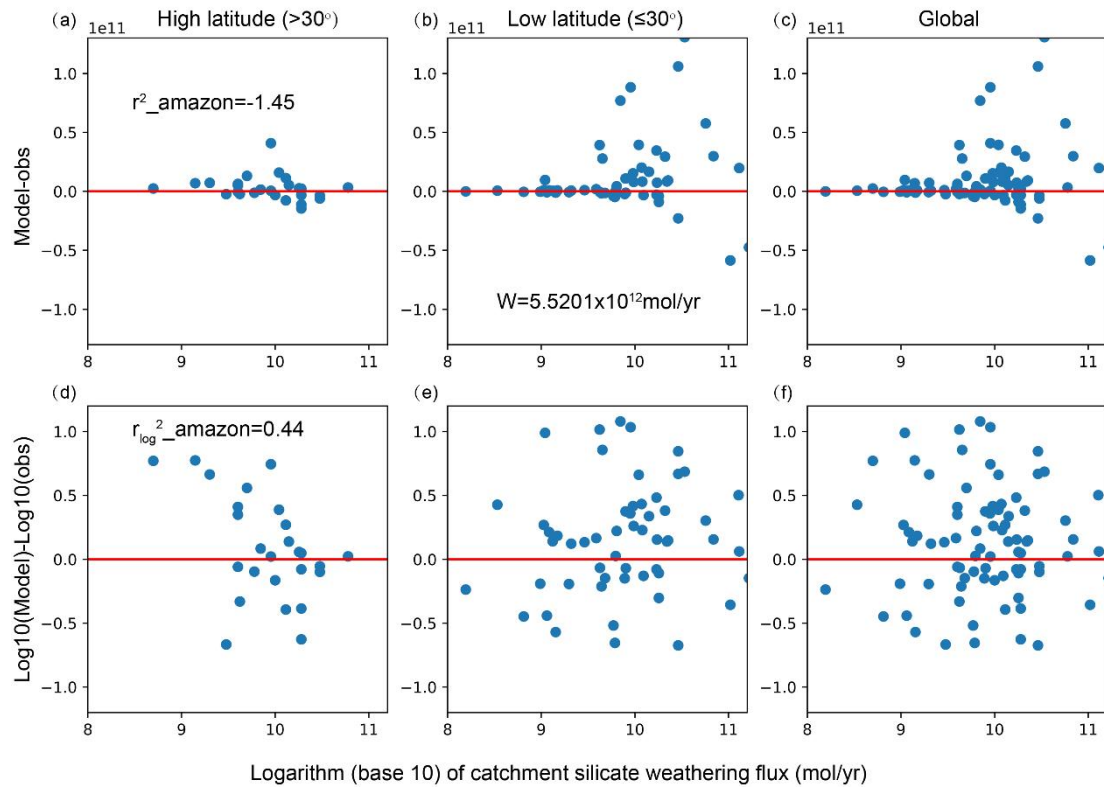

5

**Figure S1** The difference between model calculated and observed silicate weathering fluxes for 81 large rivers over the world for model calculated with parameters provided in Maffre (2022).

The upper and lower panels show model-obs and log(model)-log(obs), respectively. The left, middle and right panels show rivers in the mid- to high latitudes (more than half its river basin

is  $\geq 30^\circ$ ), low latitudes ( $< 30^\circ$ ) and over the whole globe, respectively. Calculated using the GM09 model but with model parameters in Maffre (2022). The global total weathering flux is  $5.5201 \times 10^{12} \text{ mol/yr}$ .

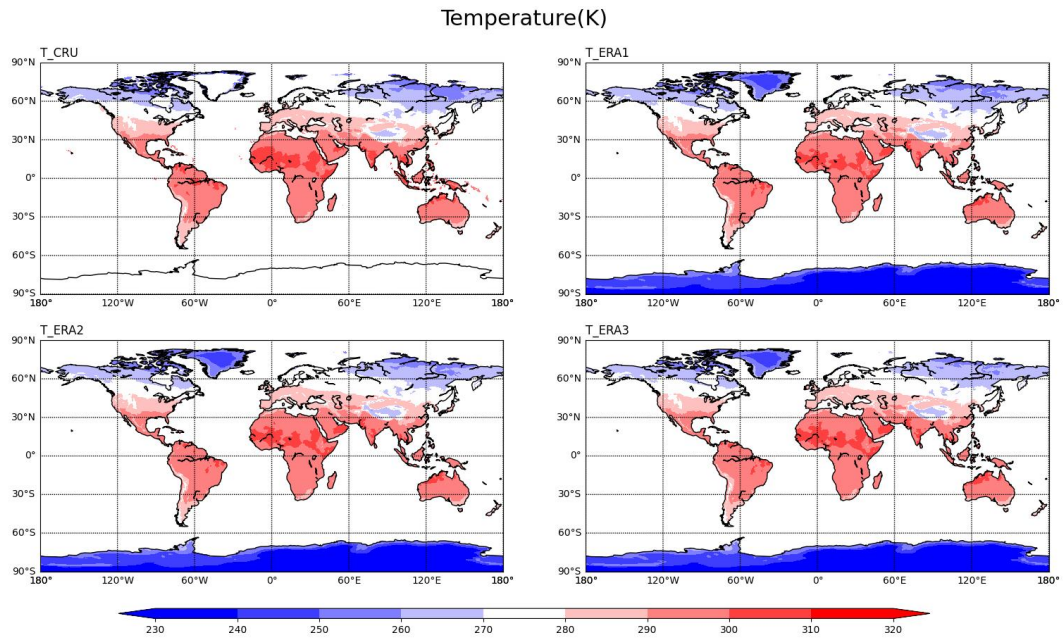

**Figure S2** The distribution of temperature for the four datasets.

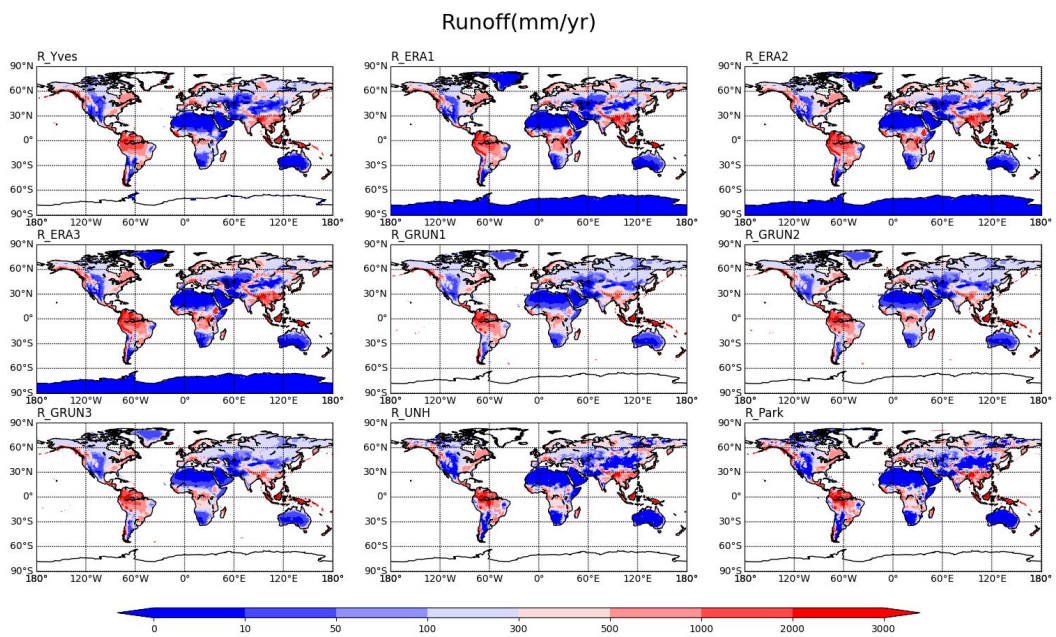

15

**Figure S3** The distribution of runoff for the nine datasets.

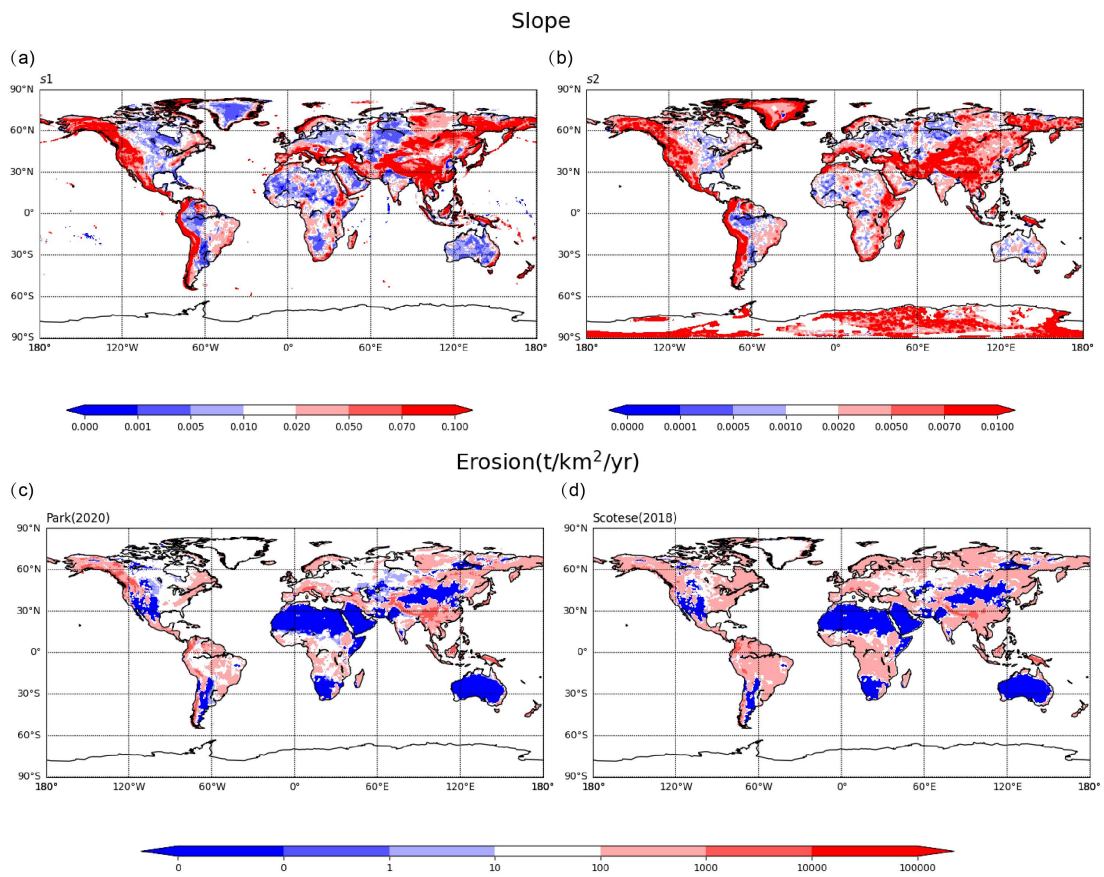

**Figure S4** The distribution of slope and erosion rate for the two slope datasets with runoff from Park (2020)-UNH (R\_Park).

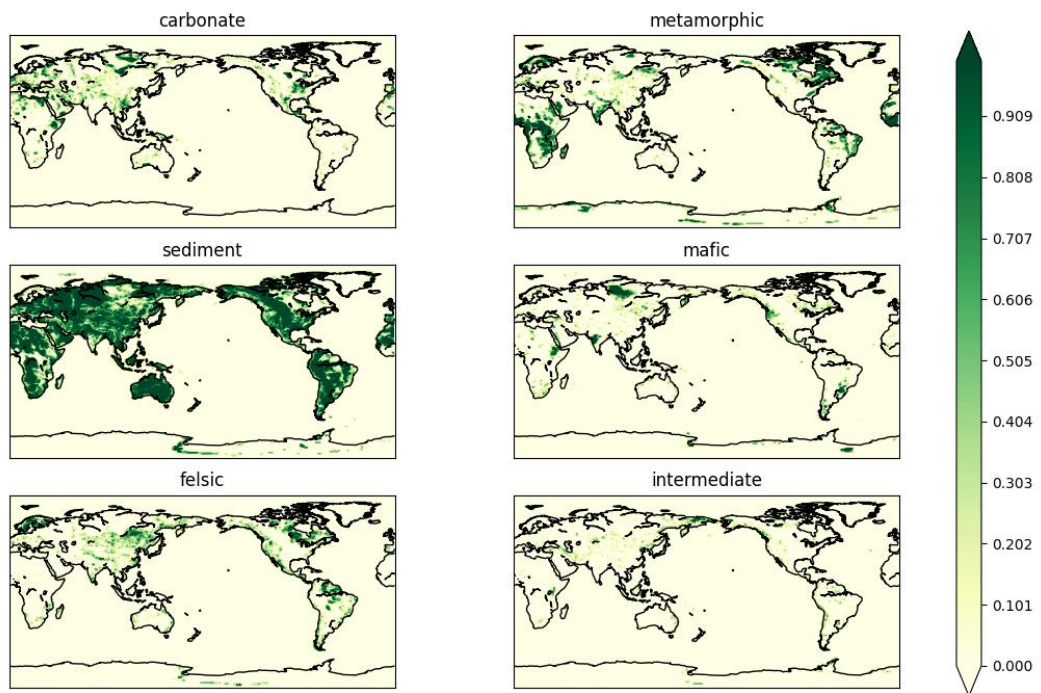

**Figure S5** Distribution of lithologies modified from (Hartmann and Moosdorf, 2012).

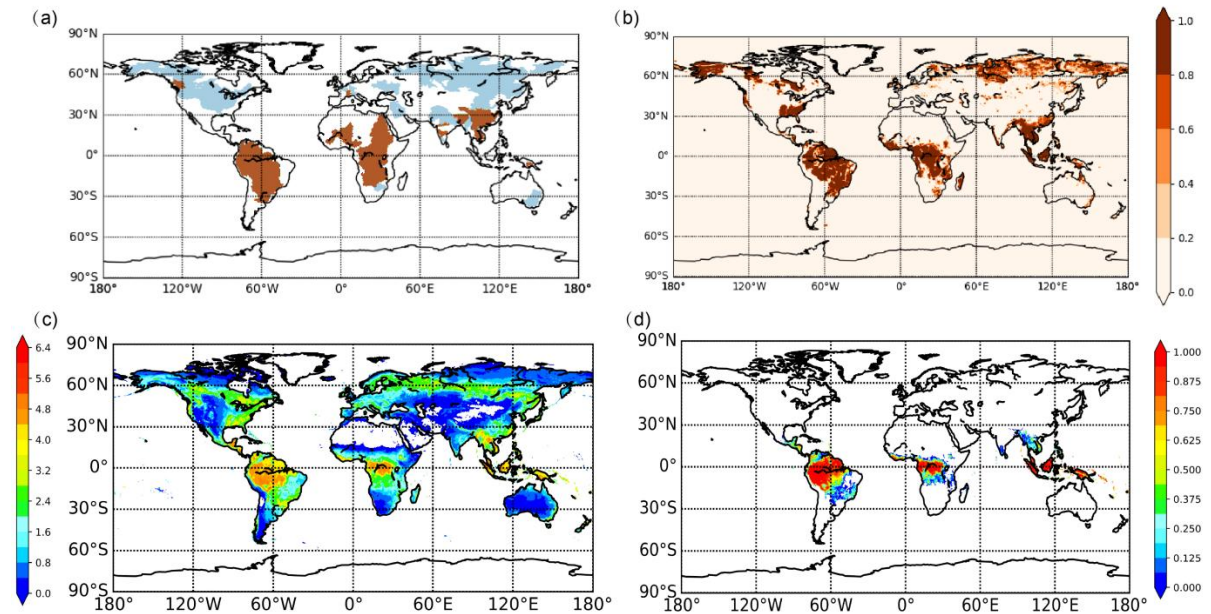

**Figure S6** Distribution of overestimated river basins, leached soil, LAI, PFT. (a) is the simulation results of weathering flux for river basins, where the brown color represents overestimation and the blue color represents underestimation. The data for this figure is derived from the runoff data provided by R\_Park, the topographic data from *s2*, and the adjusted erosion by TSS observation data; (b) is the distribution of leached soil from Harmonized World Soil Database, and the values represent the percentage of each grid that contains that type of soil; (c) and (d) present vegetation data from CESM (Community Earth System Model), specifically the Leaf Area Index (LAI) and tropical evergreen tree coverage, respectively.

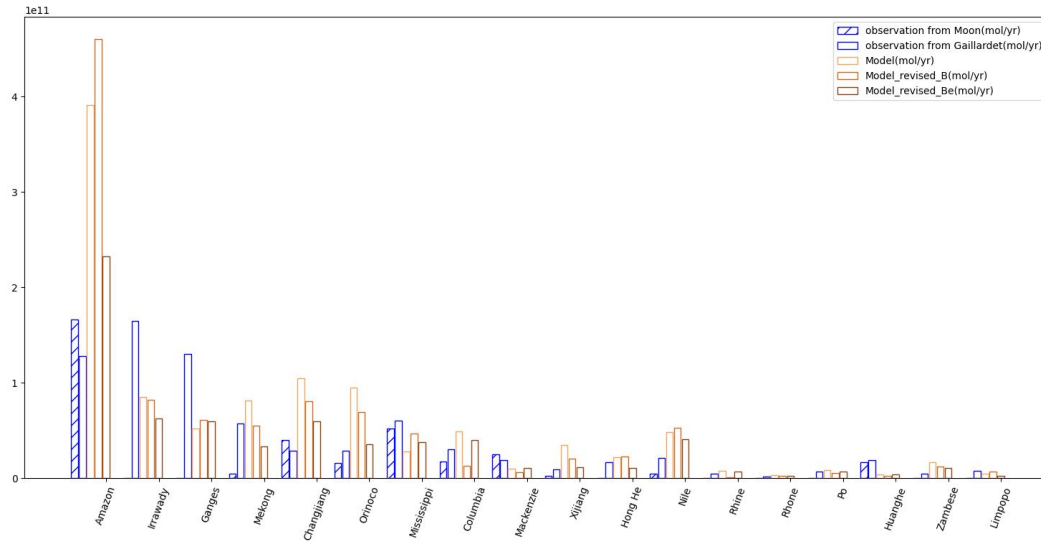

**Figure S7** Histogram of silicate weathering fluxes for 18 river basins for which erosion rate from cosmogenic nuclide analysis was provided in (Wittmann et al., 2020). The blue hollow bars represent the observations from Gaillardet and bars with inclined lines represent the observations from Moon. Three different hollow bars in oranges represent the Park20 model result (T\_CRU\_R\_Yves\_s1\_B1), revised by TSS (T\_CRU\_R\_Yves\_s1\_BT) and revised by cosmogenic nuclide analysis erosion rate data (T\_CRU\_R\_Yves\_s1\_Be), respectively.

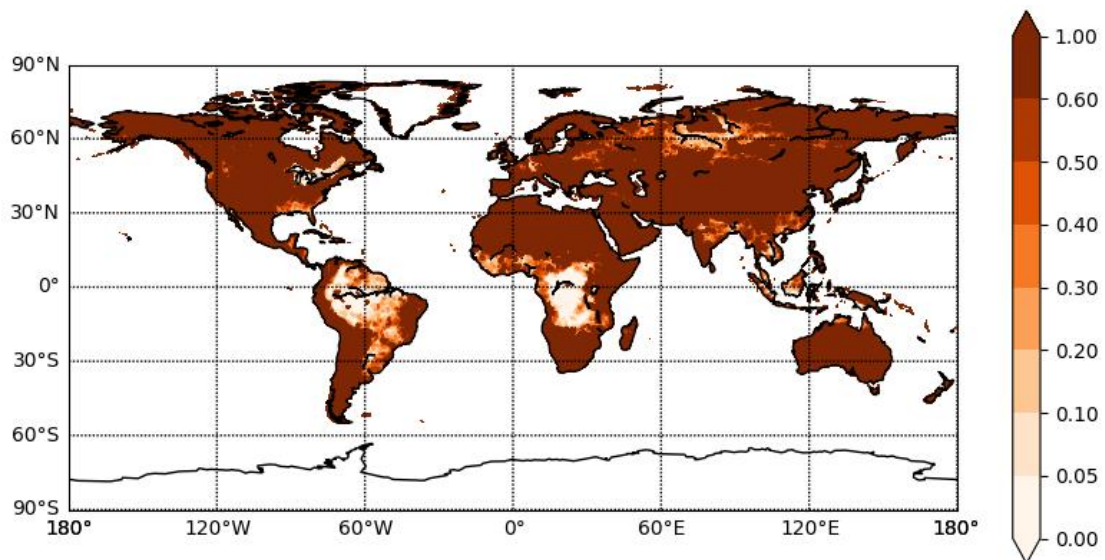

**Figure S8** The concentration ratio of topsoil  $x_s$  from the Park20 model with R\_Park runoff data, s2 slope data and erosion rate revised by TSS data.

(a) Maximize  $r^2_{\text{amazon}} + r_{\log^2_{\text{amazon}}}$

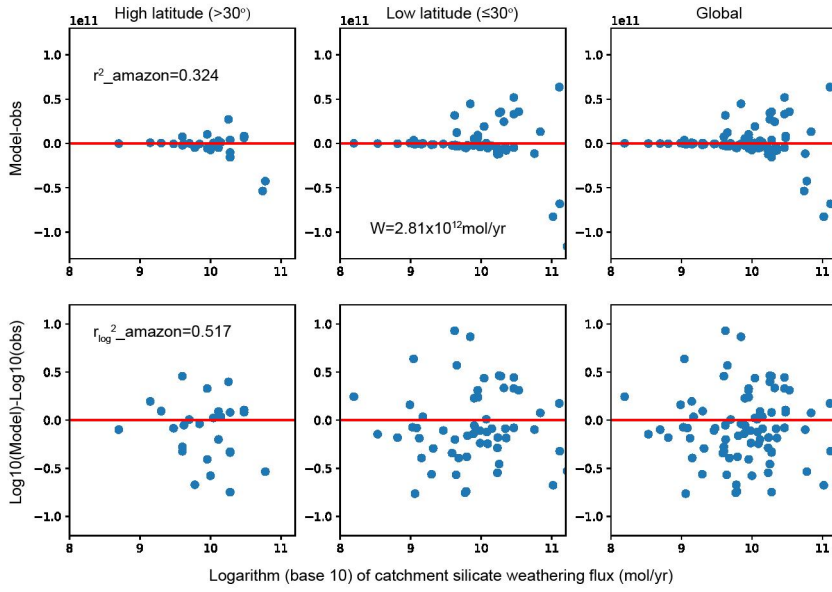

(b) Maximize  $r_{\log^2_{\text{amazon}}}$

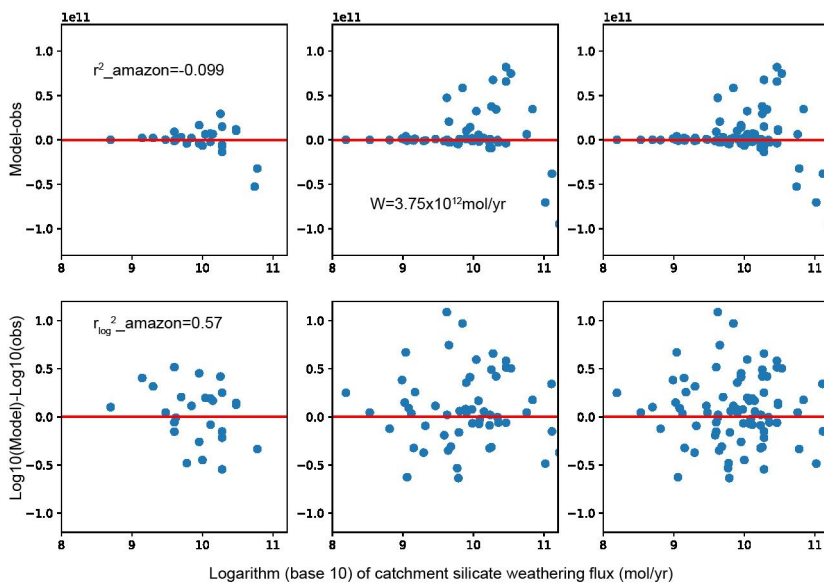

(c) Maximize  $r^2_{\text{amazon}}$

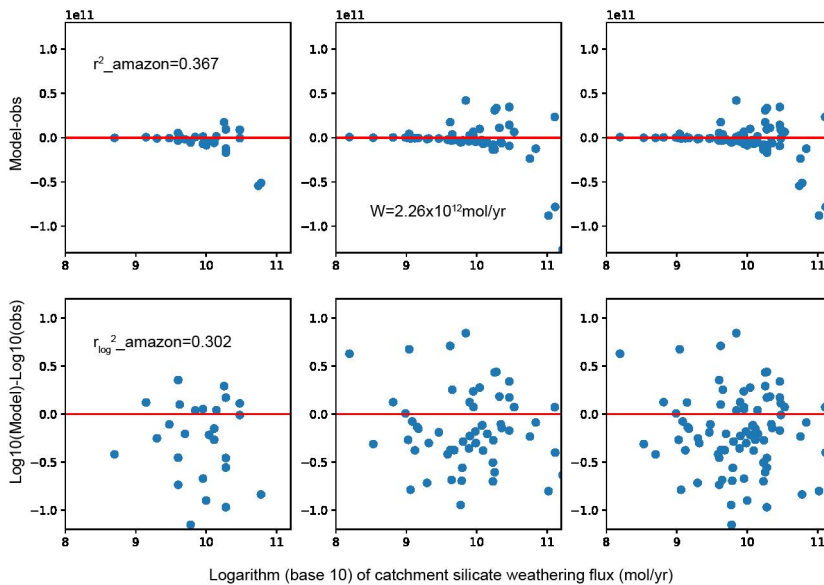

**Figure S9** The straight and logarithmic model-data errors at 81 river basins, respectively, when the parameter combination at the peak of light blue, orange and purple-red curve in Fig. 11b is used to calculate the weathering fluxes at each river basin.

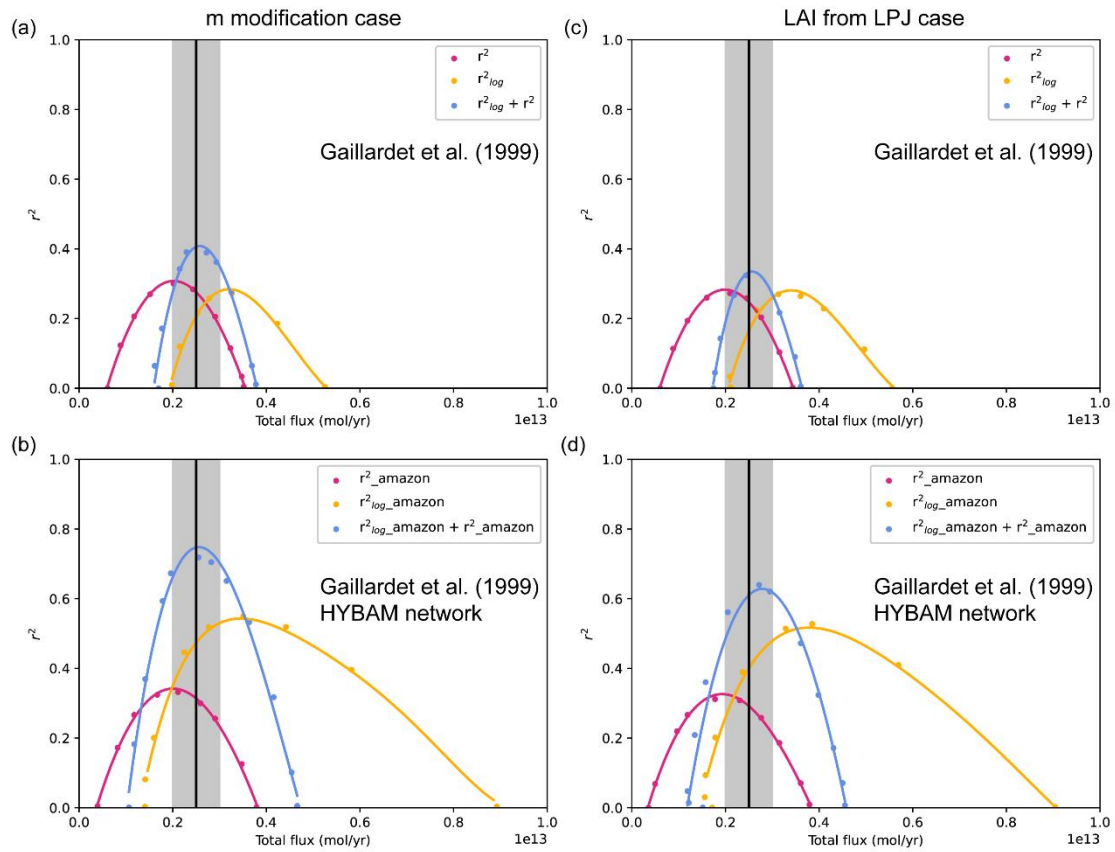

**Figure S10** (a) and (b) shows the  $r_{log}^2$  (orange) and  $r^2$  (purple-red) and their sums (light blue) of all possible combinations of the parameters for the experiment R\_Yves\_s2\_mn which changes the sensitivity of erosion rate to the runoff to be zero, and the highest R2 in this case is 0.39 and 0.72 for (a) and (b) respectively. (c) and (d) is for the case R\_Yves\_s2\_LAI\_old\_global which uses the vegetation from LPJ model and the highest R2 in this case is 0.32 and 0.64 for (a) and (b) respectively. Both of them are the results with R\_Yves runoff data. The black vertical line and grey zone in (a~d) shows the observed global total weathering flux.



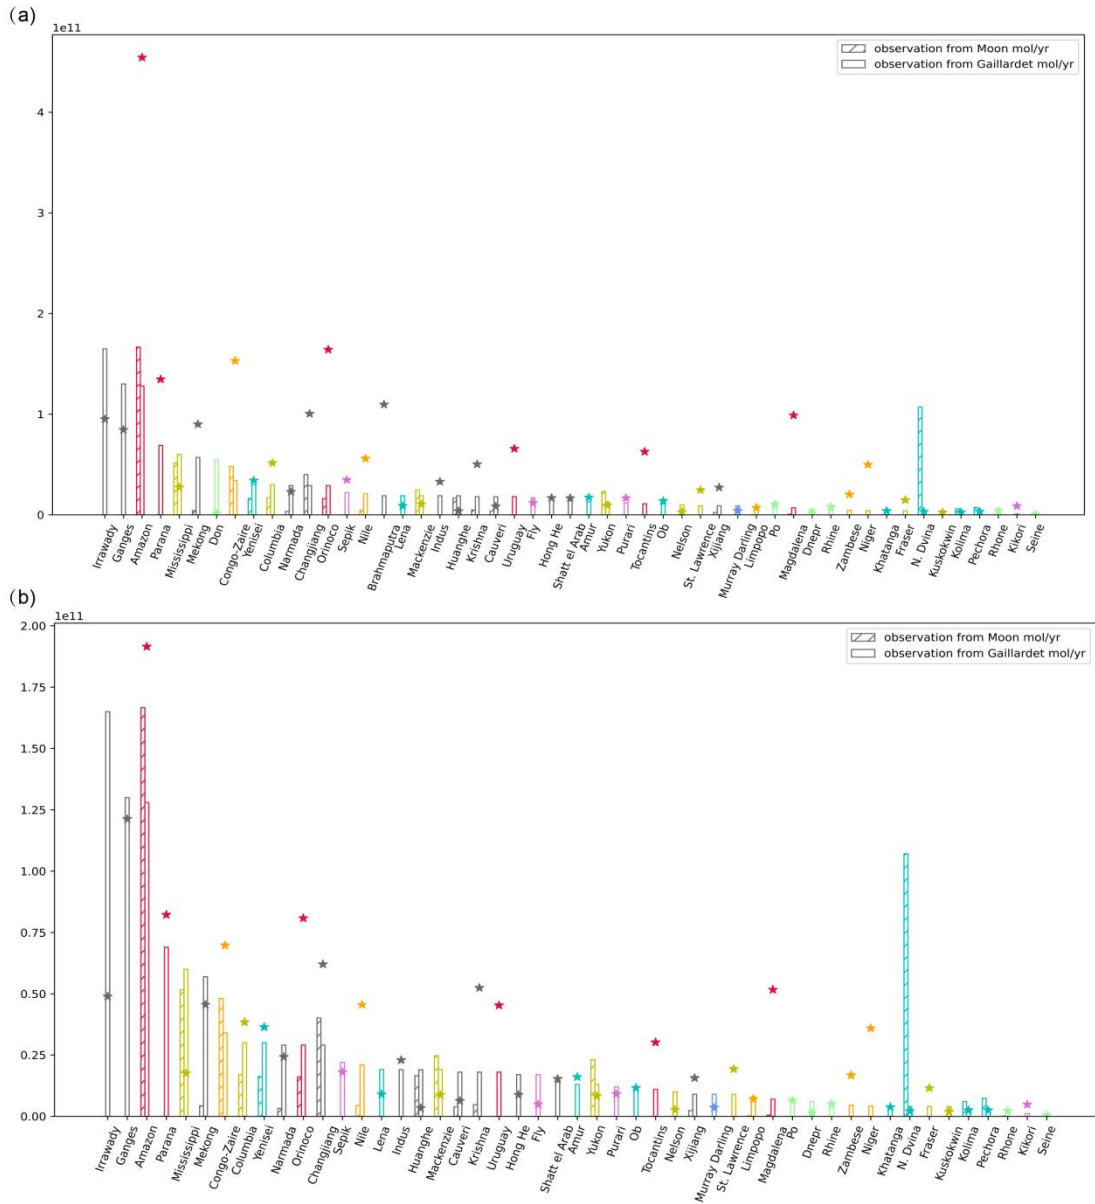

**Figure S11** A comparison of the weathering flux across 51 basins as determined by the original Park20 model (a, T\_CRU\_R\_Yves\_s2), revised model (b, T\_CRU\_R\_Yves\_s2\_LAI\_global with 60 new parameters) and observational data. Observational results are shown as bar charts, sourced from studies by Gaillardet and Moon. The horizontal axis is arranged in descending order based on the observed river weathering flux, and rivers that are closely ranked may have small differences between (a) and (b). The simulated weathering flux is represented by pentagrams. Distinct colors differentiate the various regions as can be seen from Fig. 3b.

**Table S1.** Different parameters used in different researches with the same model

| Parameter              | $\chi _{z=0}$                     | K                                                                       | $k_w$                                                                   | $k_{rp}$             | $\sigma$              |
|------------------------|-----------------------------------|-------------------------------------------------------------------------|-------------------------------------------------------------------------|----------------------|-----------------------|
| (Gabet and Mudd, 2009) | 0.62*                             | 0.0032                                                                  | /                                                                       | 0.04                 | -0.45                 |
| (West, 2012)           | 0.09<br>(0.04-0.13)*              | $2.6 \times 10^{-4}$<br>( $7.6 \times 10^{-6}$ - $1.2 \times 10^{-3}$ ) | $7.6 \times 10^{-2}$<br>( $1.5 \times 10^{-3}$ - $3.0 \times 10^{-1}$ ) | /                    | -0.11<br>(-0.34-0.13) |
| (Park et al., 2020)    | [2500, 2000, 10317, 1521, 4759]** | $5 \times 10^{-4}$                                                      | 1                                                                       | $1 \times 10^{-2}$   | -0.4                  |
| (Maffre et al., 2022)  | 1815**                            | $3 \times 10^{-4}$                                                      | 1.                                                                      | $1.2 \times 10^{-3}$ | -0.11                 |

\*The mineral concentration from the first two paper is set to be the mass fraction of chemically mobile material in the bedrock (unitless). Using the density of soil and mass of  $\text{Ca}^{2+}+\text{Mg}^{2+}$ , this unitless number can be converted to the concentration.

70 \*\*The mineral concentration for the last two paper is the concentration of  $\text{Ca}^{2+}+\text{Mg}^{2+}$  in unweathered bedrock ( $\text{mol}/\text{m}^3$ ), and the lithology is metamorphic, sediment, mafic, felsic, intermediate.

**Table S2.** Detailed information of river basins that we analysis in the paper

| River name   | Area ( $10^6 \text{ km}^2$ ) | Temperature (K) | Runoff ( $\text{mm}/\text{yr}$ ) | Erosion ( $\text{t}/\text{km}^2/\text{yr}$ ) | Continent         | Region | Ca+Mg Gaillardet ( $10^9 \text{ mol}/\text{yr}$ ) | Ca+Mg Moon ( $10^9 \text{ mol}/\text{yr}$ ) |
|--------------|------------------------------|-----------------|----------------------------------|----------------------------------------------|-------------------|--------|---------------------------------------------------|---------------------------------------------|
| Amazon       | 6.112                        | 300.15          | 1078                             | 204                                          | Southern American | Low    | 128                                               | 166.62                                      |
| Changjiang   | 1.808                        | 285.15          | 513                              | 267                                          | Southern Asia     | Low    | 29                                                | 40.09                                       |
| Mississippi  | 2.98                         | 283.15          | 195                              | 168                                          | Northern American | High   | 60                                                | 51.66                                       |
| Irrawady     | 0.41                         | 297.15          | 1185                             | 637                                          | Southern Asia     | Low    | 165                                               |                                             |
| Ganges       | 1.05                         | 292.15          | 470                              | 530                                          | Southern Asia     | Low    | 130                                               |                                             |
| Yenisei      | 2.59                         | 266.15          | 239                              | 5                                            | Northern Asia     | High   | 30                                                | 16.21                                       |
| Mackenzie    | 1.787                        | 270.55          | 172                              | 23                                           | Northern American | High   | 19                                                | 24.7                                        |
| St. Lawrence | 1.02                         | 278.55          | 330                              | 4                                            | Northern American | High   | 9                                                 |                                             |
| Lena         | 2.49                         | 264.15          | 211                              | 8                                            | Northern Asia     | High   | 19                                                |                                             |
| Xijiang      | 0.437                        | 294.15          | 831                              | 160                                          | Southern Asia     | Low    | 9                                                 | 2.38                                        |
| Ob           | 2.99                         | 272.15          | 135                              | 5                                            | Northern Asia     | High   | 11                                                |                                             |
| Brahmaputra  | 0.58                         | 288.45          | 879                              | 890                                          | Southern Asia     | Low    | 19                                                |                                             |
| Parana       | 2.783                        | 295.15          | 204                              | 34                                           | Southern American | Low    | 87                                                |                                             |
| Mekong       | 0.795                        | 294.15          | 587                              | 188                                          | Southern Asia     | Low    | 57                                                | 4.31                                        |
| Congo-Zaire  | 3.698                        | 296.75          | 324                              | 12                                           | African           | Low    | 34                                                | 48.12                                       |
| Rhine        | 0.224                        | 280.45          | 310                              | 12                                           | Europe            | High   | 5                                                 |                                             |
| Yukon        | 0.849                        | 268.15          | 236                              | 63                                           | Northern American | High   | 13                                                | 23.1                                        |
| Orinoco      | 1.1                          | 297.95          | 1032                             | 150                                          | Southern American | Low    | 29                                                | 16.06                                       |
| Magdalena    | 0.235                        | 297.15          | 1009                             | 920                                          | Southern American | Low    | 7                                                 | 0.52                                        |

|                |        |        |      |      |                   |      |      |        |
|----------------|--------|--------|------|------|-------------------|------|------|--------|
| Columbia       | 0.669  | 281.45 | 353  | 22   | Northern American | High | 30   | 17.05  |
| Indus          | 0.916  | 291.95 | 98   | 264  | Southern Asia     | High | 19   |        |
| Don            | 0.42   | 280.15 | 69   | 15   | Europe            | High | 55   |        |
| Nelson         | 1.132  |        | 79   |      | Northern American | High | 10   |        |
| N. Dvina       | 0.348  | 275.15 | 316  | 13   | Northern Asia     | High | 4    | 107.08 |
| Amur           | 1.855  | 272.15 | 185  | 30   | Northern Asia     | High | 13   |        |
| Huanghe        | 0.752  | 280.95 | 55   | 1400 | Southern Asia     | High | 19   | 16.55  |
| Rhone          | 0.0956 | 286.15 | 565  | 340  | Europe            | High | 1.4  | 0.27   |
| Shatt el Arab  | 0.5413 | 294.15 | 85   | 26.3 | Southern Asia     | High | 14   |        |
| Hong He        | 0.12   | 293.13 | 1025 | 812  | Southern Asia     | Low  | 17   |        |
| Po             | 0.07   | 286.15 | 667  | 238  | Europe            | High | 7    | 0.04   |
| Fly            | 0.061  | 298.15 | 2311 | 1500 | Arc               | Low  | 17   |        |
| Tocantins      | 0.757  | 298.85 | 491  | 117  | Southern American | Low  | 11   |        |
| Dnepr          | 0.504  | 280.15 | 103  | 5    | Europe            | High | 6    |        |
| Sepik          | 0.0787 | 298.37 | 1525 | 103  | Arc               | Low  | 22   |        |
| Nile           | 2.87   | 298.15 | 10   | 40   | African           | Low  | 21   | 4.48   |
| Narmada        | 0.102  | 299.15 | 382  | 1174 | Southern Asia     | Low  | 29   | 3.27   |
| Murray Darling | 1.06   | 291.15 | 22   | 28   | Australia         | High | 9    |        |
| Purari         | 0.0306 | 294.15 | 2749 | 2600 | Arc               | Low  | 13.1 |        |
| Fraser         | 0.22   | 277.15 | 509  | 92   | Northern American | High | 4    |        |
| Kolima         | 0.66   | 264.15 | 200  | 9    | Northern Asia     | High | 3    | 6.08   |
| Krishna        | 0.259  | 297.15 | 116  | 247  | Southern Asia     | Low  | 18   | 4.81   |
| Pechora        | 0.324  | 262.15 | 404  | 19   | Northern Asia     | High | 2    | 7.35   |
| Niger          | 1.2    | 301.05 | 128  | 32   | African           | Low  | 4.2  |        |
| Uruguay        | 0.24   | 291.15 | 604  | 45   | Southern American | High | 1.8  |        |
| Kuskokwin      | 0.123  | 267.15 | 487  | 71   | Northern American | High | 4    |        |
| Cauveri        | 0.088  | 298.93 | 239  | 363  | Southern Asia     | Low  | 18   | 3.89   |
| Zambese        | 1.33   | 294.15 | 77   | 15   | African           | Low  | 4.5  |        |
| Khatanga       | 0.364  | 259.15 | 234  | 5    | Northern Asia     | High | 4.2  |        |
| Seine          | 0.0786 | 283.15 | 164  | 15   | Europe            | High | 0.5  |        |
| Kikori         | 0.0132 |        | 3035 |      | Arc               | Low  | 1.1  |        |
| Limpopo        | 0.44   | 294.15 | 59   | 80   | African           | Low  | 8    | 0.27   |

**Table S3.** Erosion rate of rivers from different observations

| River name  | Yield (t/km <sup>2</sup> /yr)   | Yield (t/km <sup>2</sup> /yr) | BQART (t/km <sup>2</sup> /yr) | TSS (t/km <sup>2</sup> /yr) | Denudation flux from <sup>10</sup> Be (t/km <sup>2</sup> /yr) | Erosion rate in the paper (t/km <sup>2</sup> /yr) |
|-------------|---------------------------------|-------------------------------|-------------------------------|-----------------------------|---------------------------------------------------------------|---------------------------------------------------|
|             | (Milliman and Farnsworth, 2011) | (Milliman and Syvitski, 1991) | (Syvitski and Milliman, 2007) | (Meybeck and Ragu, 2012)    | (Wittmann et al., 2020)                                       |                                                   |
| Amazon      | 190                             | 190                           | 204                           | 196.2336                    | 81                                                            | 204                                               |
| Changjiang  | 261                             | 250                           | 267                           | 266.9027                    | 139                                                           | 267                                               |
| Mississippi | 121                             | 120                           | 124                           | 167.7718                    | 91                                                            | 168                                               |

|                |       |       |      |          |      |      |
|----------------|-------|-------|------|----------|------|------|
| Irrawady       | 605   | 620   | 637  | 634.1707 | 379  | 637  |
| Ganges         | 531   | 530   | 675  | 516.4762 | 491  | 530  |
| Yenisei        | 5     | 5     | 5    | 5.505792 |      | 5    |
| Mackenzie      | 56    | 23    | 55   | 23.09569 | 222  | 23   |
| St. Lawrence   | 4     | 4     | 4    | 3.964706 |      | 4    |
| Lena           | 8     | 5     | 8    | 6.325301 |      | 8    |
| Xijiang        | 163   | 160   | 210  | 157.8261 | 68   | 160  |
| Ob             | 5     | 6     | 5    | 5.404682 |      | 5    |
| Brahmaputra    | 806   | 890   |      | 932.069  |      | 890  |
| Parana         | 35    | 30    | 34   | 28.36939 |      | 34   |
| Mekong         | 188   | 200   | 128  | 188.5623 | 88   | 188  |
| Congo-Zaire    |       | 11    | 12   | 10.38399 |      | 12   |
| Rhine          | 0.3   | 4     | 12   |          | 267  | 12   |
| Yukon          | 64    | 71    | 63   | 67.37338 |      | 63   |
| Orinoco        | 136   | 150   | 184  | 136.2    | 60   | 150  |
| Magdalena      | 538   | 920   | 873  | 935.8979 |      | 920  |
| Columbia       | 22    | 22    | 22   | 22.57698 | 224  | 22   |
| Indus          | 255   | 260   | 264  | 272.9476 |      | 264  |
| Don            | 15    | 18    | 15   | 5.504762 |      | 15   |
| Nelson         |       |       |      |          |      |      |
| N. Dvina       | 12.5  | 13    |      | 13.59195 |      | 13   |
| Amur           | 27    | 28    | 30   | 13.35202 |      | 30   |
| Huanghe        | 1333  | 1400  | 1272 | 1466.622 | 222  | 1400 |
| Rhone          | 615   | 340   | 591  | 282.4268 | 183  | 340  |
| Shatt el Arab  |       | 26.3  |      | 194.1825 |      | 26.3 |
| Hong He        | 687.5 | 812.5 |      | 1083.425 | 144  | 812  |
| Po             | 203   | 280   | 238  | 220.1571 | 564  | 238  |
| Fly            | 1053  | 1500  | 1235 | 1886.164 |      | 1500 |
| Tocantins      | 117   | 117   |      | 99.26552 |      | 117  |
| Dnepr          |       | 4.5   | 5    | 4.285714 |      | 5    |
| Sepik          |       |       |      | 103.6849 |      | 103  |
| Nile           | 41    | 40    | 59   | 40.48781 | 20   | 40   |
| Narmada        |       | 1400  | 610  | 1174.206 |      | 1174 |
| Murray Darling | 0.9   | 29    | 3    | 28.29774 |      | 28   |
| Purari         | 2581  | 2600  | 2355 | 2614.628 |      | 2600 |
| Fraser         | 87    | 91    | 92   | 89.09091 |      | 92   |
| Kolima         | 15    | 9     | 9    | 25.2     |      | 9    |
| Krishna        | 246   | 260   | 247  | 246.7181 |      | 247  |
| Pechora        | 14    | 25    | 19   | 20.21605 |      | 19   |
| Niger          | 18    | 33    | 32   | 33.38833 |      | 32   |
| Uruguay        | 27    | 45    | 28   | 45.9667  |      | 45   |
| Kuskokwin      | 68    | 100   | 71   | 56.49106 |      | 71   |
| Cauveri        |       | 363   |      |          |      | 363  |
| Zambese        | 37    | 35    | 15   | 15.02406 | 10.8 | 15   |

|          |    |      |    |          |    |
|----------|----|------|----|----------|----|
| Khatanga |    | 4.72 | 5  | 3.983791 | 5  |
| Seine    | 6  | 18   | 15 | 7.221374 | 15 |
| Kikori   |    |      |    |          |    |
| Limpopo  | 80 | 80   | 87 | 74.98636 | 8  |

\*Some rivers have had decreased sediment loads resulting from dam and irrigation like Krishna, Limpopo, Indus, Huanghe, Changjiang, Narmada, Mississippi, Xijiang, Honghe, Yenisei. Consider that silicate weathering may not respond as much quickly as the erosion rate, coupled with the fact that our observations are already relatively old, we use the previous sediment loads here.

80

**Table S4.** First set of experiment in the paper

| Temp   | Runoff  | Slope | $B=1$                | $B$ tuned to TSS     | $B$ tuned to TSS and cosmogenic nuclide analysis |
|--------|---------|-------|----------------------|----------------------|--------------------------------------------------|
| T_CRU  | R_Yves  | s1    | T_CRU_R_Yves_s1_B1   | T_CRU_R_Yves_s1_BT   | T_CRU_R_Yves_s1_Be                               |
|        |         | s2    | T_CRU_R_Yves_s2_B1   | T_CRU_R_Yves_s2_BT   | T_CRU_R_Yves_s2_Be                               |
|        | R_ERA1  | s1    | T_CRU_R_ERA1_s1_B1   | T_CRU_R_ERA1_s1_BT   | T_CRU_R_ERA1_s1_Be                               |
|        |         | s2    | T_CRU_R_ERA1_s2_B1   | T_CRU_R_ERA1_s2_BT   | T_CRU_R_ERA1_s2_Be                               |
|        | R_ERA2  | s1    | T_CRU_R_ERA2_s1_B1   | T_CRU_R_ERA2_s1_BT   | T_CRU_R_ERA2_s1_Be                               |
|        |         | s2    | T_CRU_R_ERA2_s2_B1   | T_CRU_R_ERA2_s2_BT   | T_CRU_R_ERA2_s2_Be                               |
|        | R_ERA3  | s1    | T_CRU_R_ERA3_s1_B1   | T_CRU_R_ERA3_s1_BT   | T_CRU_R_ERA3_s1_Be                               |
|        |         | s2    | T_CRU_R_ERA3_s2_B1   | T_CRU_R_ERA3_s2_BT   | T_CRU_R_ERA3_s2_Be                               |
|        | R_GRUN1 | s1    | T_CRU_R_GRUN1_s1_B1  | T_CRU_R_GRUN1_s1_BT  | T_CRU_R_GRUN1_s1_Be                              |
|        |         | s2    | T_CRU_R_GRUN1_s2_B1  | T_CRU_R_GRUN1_s2_BT  | T_CRU_R_GRUN1_s2_Be                              |
|        | R_GRUN2 | s1    | T_CRU_R_GRUN2_s1_B1  | T_CRU_R_GRUN2_s1_BT  | T_CRU_R_GRUN2_s1_Be                              |
|        |         | s2    | T_CRU_R_GRUN2_s2_B1  | T_CRU_R_GRUN2_s2_BT  | T_CRU_R_GRUN2_s2_Be                              |
|        | R_GRUN3 | s1    | T_CRU_R_GRUN3_s1_B1  | T_CRU_R_GRUN3_s1_BT  | T_CRU_R_GRUN3_s1_Be                              |
|        |         | s2    | T_CRU_R_GRUN3_s2_B1  | T_CRU_R_GRUN3_s2_BT  | T_CRU_R_GRUN3_s2_Be                              |
|        | R_UNH   | s1    | T_CRU_R_UNH_s1_B1    | T_CRU_R_UNH_s1_BT    | T_CRU_R_UNH_s1_Be                                |
|        |         | s2    | T_CRU_R_UNH_s2_B1    | T_CRU_R_UNH_s2_BT    | T_CRU_R_UNH_s2_Be                                |
|        | R_Park  | s1    | T_CRU_R_Park_s1_B1   | T_CRU_R_Park_s1_BT   | T_CRU_R_Park_s1_Be                               |
|        |         | s2    | T_CRU_R_Park_s2_B1   | T_CRU_R_Park_s2_BT   | T_CRU_R_Park_s2_Be                               |
| T_ERA1 | R_Yves  | s1    | T_ERA1_R_Yves_s1_B1  | T_ERA1_R_Yves_s1_BT  | T_ERA1_R_Yves_s1_Be                              |
|        |         | s2    | T_ERA1_R_Yves_s2_B1  | T_ERA1_R_Yves_s2_BT  | T_ERA1_R_Yves_s2_Be                              |
|        | R_ERA1  | s1    | T_ERA1_R_ERA1_s1_B1  | T_ERA1_R_ERA1_s1_BT  | T_ERA1_R_ERA1_s1_Be                              |
|        |         | s2    | T_ERA1_R_ERA1_s2_B1  | T_ERA1_R_ERA1_s2_BT  | T_ERA1_R_ERA1_s2_Be                              |
|        | R_ERA2  | s1    | T_ERA1_R_ERA2_s1_B1  | T_ERA1_R_ERA2_s1_BT  | T_ERA1_R_ERA2_s1_Be                              |
|        |         | s2    | T_ERA1_R_ERA2_s2_B1  | T_ERA1_R_ERA2_s2_BT  | T_ERA1_R_ERA2_s2_Be                              |
|        | R_ERA3  | s1    | T_ERA1_R_ERA3_s1_B1  | T_ERA1_R_ERA3_s1_BT  | T_ERA1_R_ERA3_s1_Be                              |
|        |         | s2    | T_ERA1_R_ERA3_s2_B1  | T_ERA1_R_ERA3_s2_BT  | T_ERA1_R_ERA3_s2_Be                              |
|        | R_GRUN1 | s1    | T_ERA1_R_GRUN1_s1_B1 | T_ERA1_R_GRUN1_s1_BT | T_ERA1_R_GRUN1_s1_Be                             |
|        |         | s2    | T_ERA1_R_GRUN1_s2_B1 | T_ERA1_R_GRUN1_s2_BT | T_ERA1_R_GRUN1_s2_Be                             |
|        | R_GRUN2 | s1    | T_ERA1_R_GRUN2_s1_B1 | T_ERA1_R_GRUN2_s1_BT | T_ERA1_R_GRUN2_s1_Be                             |
|        |         | s2    | T_ERA1_R_GRUN2_s2_B1 | T_ERA1_R_GRUN2_s2_BT | T_ERA1_R_GRUN2_s2_Be                             |
|        | R_GRUN3 | s1    | T_ERA1_R_GRUN3_s1_B1 | T_ERA1_R_GRUN3_s1_BT | T_ERA1_R_GRUN3_s1_Be                             |

|        |         |    |                      |                      |                      |
|--------|---------|----|----------------------|----------------------|----------------------|
|        |         | s2 | T_ERA1_R_GRUN3_s2_B1 | T_ERA1_R_GRUN3_s2_BT | T_ERA1_R_GRUN3_s2_Be |
|        | R_UNH   | s1 | T_ERA1_R_UNH_s1_B1   | T_ERA1_R_UNH_s1_BT   | T_ERA1_R_UNH_s1_Be   |
|        |         | s2 | T_ERA1_R_UNH_s2_B1   | T_ERA1_R_UNH_s2_BT   | T_ERA1_R_UNH_s2_Be   |
|        | R_Park  | s1 | T_ERA1_R_Park_s1_B1  | T_ERA1_R_Park_s1_BT  | T_ERA1_R_Park_s1_Be  |
|        |         | s2 | T_ERA1_R_Park_s2_B1  | T_ERA1_R_Park_s2_BT  | T_ERA1_R_Park_s2_Be  |
|        | R_Yves  | s1 | T_ERA2_R_Yves_s1_B1  | T_ERA2_R_Yves_s1_BT  | T_ERA2_R_Yves_s1_Be  |
|        |         | s2 | T_ERA2_R_Yves_s2_B1  | T_ERA2_R_Yves_s2_BT  | T_ERA2_R_Yves_s2_Be  |
|        | R_ERA1  | s1 | T_ERA2_R_ERA2_s1_B1  | T_ERA2_R_ERA2_s1_BT  | T_ERA2_R_ERA2_s1_Be  |
|        |         | s2 | T_ERA2_R_ERA2_s2_B1  | T_ERA2_R_ERA2_s2_BT  | T_ERA2_R_ERA2_s2_Be  |
|        | R_ERA2  | s1 | T_ERA2_R_ERA2_s1_B1  | T_ERA2_R_ERA2_s1_BT  | T_ERA2_R_ERA2_s1_Be  |
|        |         | s2 | T_ERA2_R_ERA2_s2_B1  | T_ERA2_R_ERA2_s2_BT  | T_ERA2_R_ERA2_s2_Be  |
|        | R_ERA3  | s1 | T_ERA2_R_ERA3_s1_B1  | T_ERA2_R_ERA3_s1_BT  | T_ERA2_R_ERA3_s1_Be  |
|        |         | s2 | T_ERA2_R_ERA3_s2_B1  | T_ERA2_R_ERA3_s2_BT  | T_ERA2_R_ERA3_s2_Be  |
| T_ERA2 | R_GRUN1 | s1 | T_ERA2_R_GRUN1_s1_B1 | T_ERA2_R_GRUN1_s1_BT | T_ERA2_R_GRUN1_s1_Be |
|        |         | s2 | T_ERA2_R_GRUN1_s2_B1 | T_ERA2_R_GRUN1_s2_BT | T_ERA2_R_GRUN1_s2_Be |
|        | R_GRUN2 | s1 | T_ERA2_R_GRUN2_s1_B1 | T_ERA2_R_GRUN2_s1_BT | T_ERA2_R_GRUN2_s1_Be |
|        |         | s2 | T_ERA2_R_GRUN2_s2_B1 | T_ERA2_R_GRUN2_s2_BT | T_ERA2_R_GRUN2_s2_Be |
|        | R_GRUN3 | s1 | T_ERA2_R_GRUN3_s1_B1 | T_ERA2_R_GRUN3_s1_BT | T_ERA2_R_GRUN3_s1_Be |
|        |         | s2 | T_ERA2_R_GRUN3_s2_B1 | T_ERA2_R_GRUN3_s2_BT | T_ERA2_R_GRUN3_s2_Be |
|        | R_UNH   | s1 | T_ERA2_R_UNH_s1_B1   | T_ERA2_R_UNH_s1_BT   | T_ERA2_R_UNH_s1_Be   |
|        |         | s2 | T_ERA2_R_UNH_s2_B1   | T_ERA2_R_UNH_s2_BT   | T_ERA2_R_UNH_s2_Be   |
|        | R_Park  | s1 | T_ERA2_R_Park_s1_B1  | T_ERA2_R_Park_s1_BT  | T_ERA2_R_Park_s1_Be  |
|        |         | s2 | T_ERA2_R_Park_s2_B1  | T_ERA2_R_Park_s2_BT  | T_ERA2_R_Park_s2_Be  |
|        | R_Yves  | s1 | T_ERA3_R_Yves_s1_B1  | T_ERA3_R_Yves_s1_BT  | T_ERA3_R_Yves_s1_Be  |
|        |         | s2 | T_ERA3_R_Yves_s2_B1  | T_ERA3_R_Yves_s2_BT  | T_ERA3_R_Yves_s2_Be  |
|        | R_ERA1  | s1 | T_ERA3_R_ERA3_s1_B1  | T_ERA3_R_ERA3_s1_BT  | T_ERA3_R_ERA3_s1_Be  |
|        |         | s2 | T_ERA3_R_ERA3_s2_B1  | T_ERA3_R_ERA3_s2_BT  | T_ERA3_R_ERA3_s2_Be  |
|        | R_ERA2  | s1 | T_ERA3_R_ERA3_s1_B1  | T_ERA3_R_ERA3_s1_BT  | T_ERA3_R_ERA3_s1_Be  |
|        |         | s2 | T_ERA3_R_ERA3_s2_B1  | T_ERA3_R_ERA3_s2_BT  | T_ERA3_R_ERA3_s2_Be  |
|        | R_ERA3  | s1 | T_ERA3_R_ERA3_s1_B1  | T_ERA3_R_ERA3_s1_BT  | T_ERA3_R_ERA3_s1_Be  |
|        |         | s2 | T_ERA3_R_ERA3_s2_B1  | T_ERA3_R_ERA3_s2_BT  | T_ERA3_R_ERA3_s2_Be  |
| T_ERA3 | R_GRUN1 | s1 | T_ERA3_R_GRUN1_s1_B1 | T_ERA3_R_GRUN1_s1_BT | T_ERA3_R_GRUN1_s1_Be |
|        |         | s2 | T_ERA3_R_GRUN1_s2_B1 | T_ERA3_R_GRUN1_s2_BT | T_ERA3_R_GRUN1_s2_Be |
|        | R_GRUN2 | s1 | T_ERA3_R_GRUN2_s1_B1 | T_ERA3_R_GRUN2_s1_BT | T_ERA3_R_GRUN2_s1_Be |
|        |         | s2 | T_ERA3_R_GRUN2_s2_B1 | T_ERA3_R_GRUN2_s2_BT | T_ERA3_R_GRUN2_s2_Be |
|        | R_GRUN3 | s1 | T_ERA3_R_GRUN3_s1_B1 | T_ERA3_R_GRUN3_s1_BT | T_ERA3_R_GRUN3_s1_Be |
|        |         | s2 | T_ERA3_R_GRUN3_s2_B1 | T_ERA3_R_GRUN3_s2_BT | T_ERA3_R_GRUN3_s2_Be |
|        | R_UNH   | s1 | T_ERA3_R_UNH_s1_B1   | T_ERA3_R_UNH_s1_BT   | T_ERA3_R_UNH_s1_Be   |
|        |         | s2 | T_ERA3_R_UNH_s2_B1   | T_ERA3_R_UNH_s2_BT   | T_ERA3_R_UNH_s2_Be   |
|        | R_Park  | s1 | T_ERA3_R_Park_s1_B1  | T_ERA3_R_Park_s1_BT  | T_ERA3_R_Park_s1_Be  |
|        |         | s2 | T_ERA3_R_Park_s2_B1  | T_ERA3_R_Park_s2_BT  | T_ERA3_R_Park_s2_Be  |

**Table S5.** Parameters in  $k_{rp}$  function (in the order of a, b, c of Eq. (13) and (14))

|                   |                 |               |
|-------------------|-----------------|---------------|
| (0.0244, 1.05, 1) | (0.015, 2.3, 1) | (0.005, 9, 1) |
| (0.0244, 1.05, 2) | (0.015, 2.3, 2) | (0.005, 9, 2) |
| (0.0244, 1.05, 4) | (0.015, 2.3, 4) | (0.005, 9, 4) |
| (0.0244, 1.05, 8) | (0.015, 2.3, 8) | (0.005, 9, 8) |

85

Gabet, E. J. and Mudd, S. M.: A theoretical model coupling chemical weathering rates with denudation rates, *Geology*, 37, 151-154, 10.1130/G25270A.1, 2009.

Hartmann, J. and Moosdorf, N.: The new global lithological map database GLiM: A representation of rock properties at the Earth surface, *Geochemistry, Geophysics, Geosystems*, 13,

90 10.1029/2012gc004370, 2012.

Maffre, P., Godderis, Y., Pohl, A., Donnadieu, Y., Carretier, S., and Hir, G.: The complex response of continental silicate rock weathering to the colonization of the continents by vascular plants in the Devonian, *American Journal of Science*, 322, 461-492, 10.2475/03.2022.02, 2022.

95 10.1594/PANGAEA.804574, 2012.

Milliman, J. and Farnsworth, K.: River Discharge to the Coastal Ocean – A Global Synthesis, 10.1017/CBO9780511781247, 2011.

Milliman, J. and Syvitski, J.: Geomorphic Tectonic Control of Sediment Discharge to Ocean – The Importance of Small Mountainous Rivers, *Journal of Geology*, 100, 525-544, 10.1086/629606, 1991.

100 Park, Y., Maffre, P., Godderis, Y., Macdonald, F., Anttila, E., and Swanson-Hysell, N.: Emergence of the Southeast Asian islands as a driver for Neogene cooling, *Proceedings of the National Academy of Sciences of the United States of America*, 117, 10.1073/pnas.2011033117, 2020.

Syvitski, J. and Milliman, J.: Geology, Geography, and Humans Battle for Dominance over the Delivery of Fluvial Sediment to the Coastal Ocean, *Journal of Geology*, 115, 10.1086/509246, 2007.

105 West, A. J.: Thickness of the chemical weathering zone and implications for erosional and climatic drivers of weathering and for carbon-cycle feedbacks, *Geology*, 40, 811-814, 10.1130/G33041.1, 2012.

Wittmann, H., Oelze, M., Gaillardet, J., Garzanti, E., and Blanckenburg, F.: A global rate of denudation from cosmogenic nuclides in the Earth's largest rivers, *Earth-Science Reviews*, 204, 103147, 10.1016/j.earscirev.2020.103147, 2020.

110
